# Supplementary material for: A target-induced and equipment-free biosensor for amplified visual detection of pesticide acetamiprid with high sensitivity and selectivity
Source: Royal Society of Chemistry journal article supplement (doi:10.1039/c8ay02513d), 2019-01-01
Supplement: c8ay02513d1.pdf [file c8ay02513d1.pdf]

**Electronic Supplementary Information**

**Target-induced and equipment-free biosensor for amplified visual detection of pesticide acetamiprid with high sensitivity and selectivity**

Lingwen Zeng,<sup>a</sup> Danhua Zhou,<sup>b</sup> Jinghua Wu,<sup>a</sup> Chengshuai Liu<sup>c</sup> and Junhua Chen<sup>\*b</sup>

<sup>a</sup>School of Food Science and Engineering, Foshan University, Foshan 528000, China.

<sup>b</sup>Guangdong Key Laboratory of Integrated Agro-environmental Pollution Control and Management, Guangdong Institute of Eco-environmental Science & Technology, Guangzhou 510650, China.

<sup>c</sup>State Key Laboratory of Environmental Geochemistry, Institute of Geochemistry, Chinese Academy of Sciences, Guiyang 550081, China.

**\*Corresponding author:**

**E-mail: 222chenjunhua@163.com**

## Circular dichroism (CD) experiment

CD spectra were measured on a Chirascan Circular Dichroism Spectrometer (Applied Photophysics Ltd, England, UK) at room temperature. The hairpin probe solution (5  $\mu\text{M}$ ) was prepared in 20 mM Tris-HCl, 100 mM NaCl, 10 mM  $\text{MgCl}_2$ , pH 7.4. The solution at different temperatures were tested. CD spectra from 320 to 220 nm were recorded in 1 mm path length cuvettes and averaged from three scans with the buffer background subtracted.

CD was used to characterize the secondary structure change of the hairpin probe at different temperatures. As shown in Fig. S1, at 25  $^{\circ}\text{C}$ , the hairpin probe showed a positive peak near 275 nm and a negative peak near 245 nm, which referred to the typical characteristic of B-form DNA double helix structure in the hairpin probe.<sup>1-3</sup> When the temperature raised to 37  $^{\circ}\text{C}$ , the value of peaks decreased obviously at 245 nm and 275 nm, indicating the decrease of the base pairs in hairpin probe. When the temperature was at 45  $^{\circ}\text{C}$ , the hairpin conformation would be destroyed. In this state, the peaks at 245 nm and 275 nm were almost disappeared. In our experiments, 25  $^{\circ}\text{C}$  was considered to be the optimum incubation temperature.

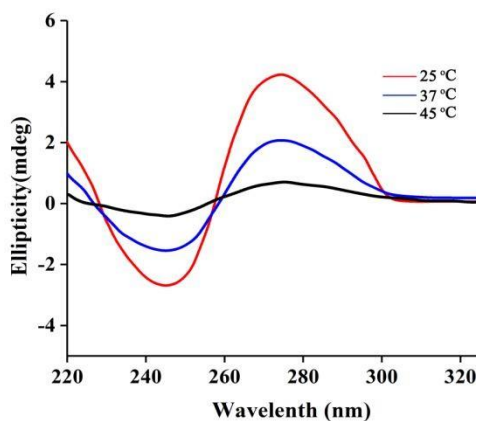

Fig. S1 CD spectra for analyzing the hairpin probe structure at different temperatures (25, 37, and 45  $^{\circ}\text{C}$ ). Concentrations of the HP probe were 5  $\mu\text{M}$ .

Table S1 Comparison of the sensing methods for acetamiprid detection

| Sensing Strategy                                                                        | Detection Limit | References |
|-----------------------------------------------------------------------------------------|-----------------|------------|
| FRET-based chemosensor                                                                  | 20 nM           | 4          |
| Aptamer based fluorometric assay                                                        | 127 pM          | 5          |
| Fluorescent assay based on gold nanoparticles and quantum dots                          | 7.29 nM         | 6          |
| Electrochemical sensor based on the use of an unmodified gold electrode                 | 153 pM          | 7          |
| Photoelectrochemical aptasensing based on MoS <sub>2</sub> nanoplates and quantum dots. | 16.7 fM         | 8          |
| Triple-helix molecular switch for fluorescent detection                                 | 9.12 nM         | 9          |
| A colorimetric detection based on Au nanoparticles                                      | 400 nM          | 10         |
| Colorimetric aptasensor based on hemin-functionalized reduced graphene oxide            | 40 nM           | 11         |
| Photoelectrochemical aptasensor based on magnetic semiconductor nanoparticles           | 180 pM          | 12         |
| Impedimetric aptasensor based on microwires formed by platinum nanoparticles            | 1 pM            | 13         |
| Target-induced and equipment-free biosensor for amplified visual detection              | 10 pM           | This work  |

## References

- 1 R. Cheng, S. Liu, H. Shi and G. Zhao, *J. Hazard. Mater.*, 2018, **341**, 373-380.
- 2 J. Zhu, T. Li, L. Zhang, S. Dong and E. Wang, *Biomaterials* 2011, **32**, 7318-7324.
- 3 Y. Guo, J. Wu and H. Ju, *Chem. Sci.*, 2015, **6**, 4318-4323.
- 4 L. Xiang and J. Tang, *RSC Adv.*, 2017, **7**, 8332-8337.

- 5 K. Abnous, N. M. Danesh, M. Ramezani, M. Alibolandi, P. Lavaee and S. M. Taghdisi, *Microchim Acta* 2017, **184**, 81-90.
- 6 J. Guo, Y. Li, L. Wang, J. Xu, Y. Huang, Y. Luo, F. Shen, C. Sun and R. Meng, *Anal. Bioanal. Chem.*, 2016, **408**, 557-566.
- 7 S. M. Taghdisi, N. M. Danesh, M. Ramezani and K. Abnous, *Microchim Acta* 2017, **184**, 499-505.
- 8 D. Jiang, X. Du, L. Zhou, H. Li and K. Wang, *Anal. Chem.*, 2017, **89**, 4525-4531.
- 9 X. Liu, Y. Li, J. Liang, W. Zhu, J. Xu, R. Su, L. Yuan and C. Sun, *Talanta* 2016, **160**, 99-105.
- 10 Y. Tian, Y. Wang, Z. Sheng, T. Li and X. Li, *Anal. Biochem.*, 2016, **513**, 87-92.
- 11 Z. Yang, J. Qian, X. Yang, D. Jiang, X. Du, K. Wang, H. Mao and K. Wang, *Biosens. Bioelectron.*, 2015, **65**, 39-46
- 12 H. Li, Y. Qian, J. Li, H. Fang, D. Fan and W. Wang, *Biosens. Bioelectron.*, 2016, **77**, 378-384.
- 13 L. Madianos, G. Tskenis, E. Skotadis, L. Patsiouras and D. Tsoukalas, *Biosens. Bioelectron.*, 2018, **101**, 268-274.
